# Supplementary material
Source: PubMed Central journal article supplement (PMC6944069)
Supplement: NIHMS1545201-supplement-1.pdf [file NIHMS1545201-supplement-1.pdf]

**Table S1 Related to Figure 1: Total number of patients by cancer type across databases**

| Cancer Type                | Total n | Weighted Average frequency of <i>ERBB2</i> mutations (Figure 1A) | Weighted Average frequency of <i>ERBB2</i> Exon 20 Mutations (Figure 1B) |
|----------------------------|---------|------------------------------------------------------------------|--------------------------------------------------------------------------|
| Bile Duct                  | 829     | 5.307%                                                           | 0.724%                                                                   |
| Bladder                    | 3146    | 8.295%                                                           | 0.858%                                                                   |
| Brain                      | 10105   | 0.350%                                                           | 0.040%                                                                   |
| Breast                     | 29609   | 3.115%                                                           | 0.882%                                                                   |
| Cervix                     | 1301    |                                                                  | 0.384%                                                                   |
| Colorectal                 | 33302   | 2.185%                                                           | 0.287%                                                                   |
| Early Gastric Cancer       | 341     | 3.812%                                                           | 0.293%                                                                   |
| Endometrial                | 4962    | 2.156%                                                           | 0.181%                                                                   |
| Esophageal                 | 4824    | 2.902%                                                           | 0.435%                                                                   |
| Head and Neck              | 3428    | 1.083%                                                           | 0.146%                                                                   |
| Kidney                     | 3600    | 1.164%                                                           | 0.167%                                                                   |
| Leukemia                   | 2451    | 0.122%                                                           | 0.082%                                                                   |
| Non-small Cell Lung Cancer | 7859    | 2.150%                                                           | 1.525%                                                                   |
| Melanoma                   | 7409    | 0.892%                                                           | 0.165%                                                                   |
| Neuroendocrine             | 60085   | 0.896%                                                           | 0.121%                                                                   |
| Ovarian                    | 11762   | 2.380%                                                           | 0.188%                                                                   |
| Pancreatic                 | 7988    | 0.964%                                                           | 0.100%                                                                   |
| Peritoneal                 | 693     | 0.937%                                                           | 0.433%                                                                   |
| Prostate                   | 5319    | 1.154%                                                           | 0.019%                                                                   |
| salivary gland             | 962     | 0.303%                                                           | 0.832%                                                                   |
| Sarcoma                    | 3198    | 0.534%                                                           | 0.063%                                                                   |
| Small Cell                 | 2380    |                                                                  | 0.336%                                                                   |
| Small Intestine            | 1028    | 4.730%                                                           | 1.751%                                                                   |
| Stomach                    | 2969    | 4.515%                                                           | 0.370%                                                                   |
| Thyroid                    | 2175    | 0.181%                                                           | 0.046%                                                                   |

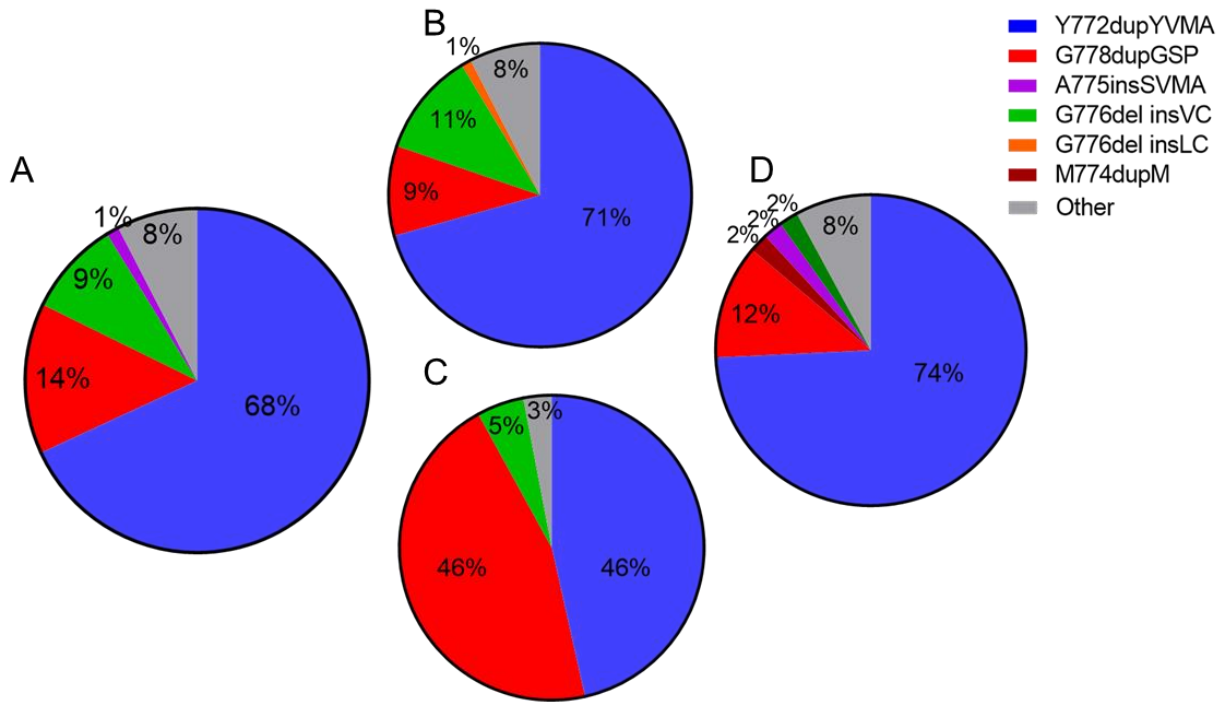

**Figure S1 Related to Figure 2: Exon 20 insertion mutations vary in sequence.**

**(A)** *ERBB2* exon 20 insertion mutation frequency in all cancer types.

**(B-D)** Frequency of *ERBB2* exon 20 insertion mutations in lung cancer **(B)**, breast cancer **(C)**, and other cancers **(D)**.

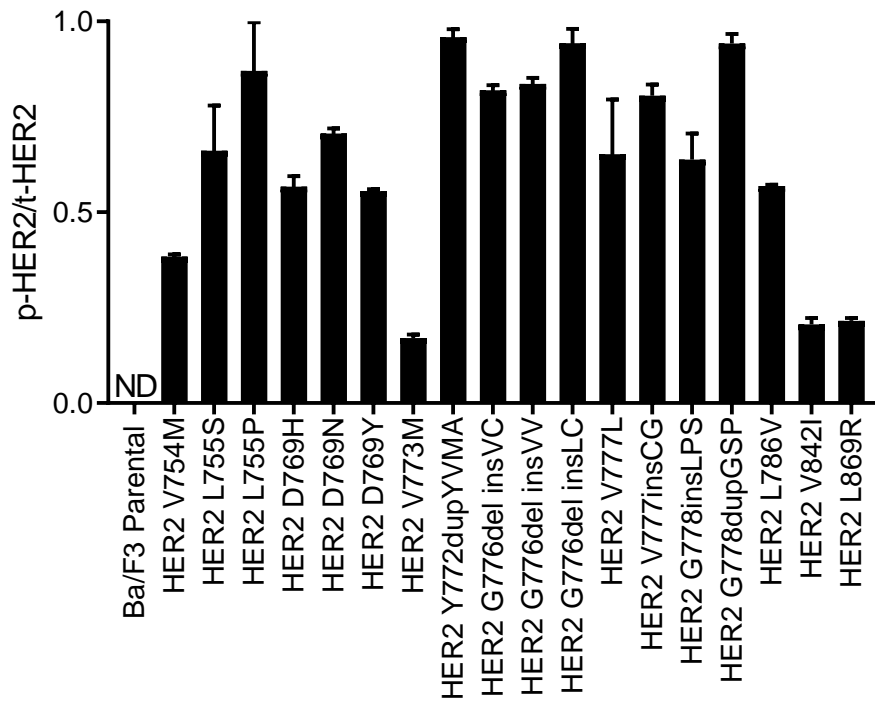

**Figure S2 Related to Figure 3: Common HER2 mutants are constitutively, but differentially phosphorylated.**

Relative p-HER2 expression was determined by taking the ratio of p-HER2 over total HER2 expression. Bars are representative of the mean  $\pm$  SEM, and  $n = 3$ . ND = below the limit of detection.

**A**

| IC <sub>50</sub> (nM) | Sapitinib | Lapatinib | Afatinib | Dacomitinib | Neratinib | Tarlox-TKI | Poziotinib | Pyrotinib | Ibrutinib | Osimertinib | Nazartinib |
|-----------------------|-----------|-----------|----------|-------------|-----------|------------|------------|-----------|-----------|-------------|------------|
| EGFR WT (+10 ng/μl)   | 230.90    | 176.77    | 20.20    | 19.26       | 38.75     | 9.85       | 6.49       | 639.95    | 80.87     | 142.27      | 349.18     |
| HER2 L755S            | 376.30    | 112.46    | 4.37     | 12.49       | 3.28      | 3.67       | 0.53       | 41.60     | 51.54     | 12.41       | 23.48      |
| HER2 L755P            | 587.25    | 474.68    | 20.54    | 25.16       | 19.71     | 5.61       | 3.65       | 55.18     | 190.24    | 69.58       | 68.99      |
| HER2 D769H            | 231.00    | 31.66     | 2.71     | 7.04        | 2.50      | 0.57       | 0.35       | 5.36      | 7.38      | 13.80       | 35.55      |
| HER2 D769N            | 83.79     | 1.76      | 0.81     | 2.65        | 0.51      | 0.93       | 0.12       | 4.53      | 3.74      | 8.10        | 10.10      |
| HER2 D769Y            | 58.15     | 8.68      | 1.48     | 3.67        | 1.02      | 0.59       | 0.36       | 0.78      | 6.68      | 7.38        | 23.13      |
| HER2 V773M            | 115.95    | 57.57     | 3.27     | 15.19       | 2.99      | 0.50       | 1.07       | 0.57      | 8.80      | 29.44       | 76.71      |
| HER2 V777L            | 21.19     | 6.01      | 1.17     | 3.42        | 1.62      | 0.50       | 0.13       | 0.74      | 4.48      | 6.96        | 10.96      |
| HER2 Y772dupYVMA      | 1274.72   | 2253.86   | 42.05    | 143.43      | 31.08     | 27.55      | 1.87       | 118.80    | 343.71    | 577.77      | 428.94     |
| HER2 G776del insVC    | 419.75    | 2340.50   | 29.34    | 84.87       | 33.59     | 9.30       | 4.85       | 89.82     | 232.31    | 412.60      | 669.49     |
| HER2 G776del insVV    | 5188.24   | 972.53    | 14.90    | 45.37       | 20.85     | 4.83       | 2.99       | 1665.65   | 162.58    | 188.06      | 316.36     |
| HER2 G776del insLC    | 164.00    | 319.54    | 7.01     | 25.11       | 6.55      | 2.13       | 1.13       | 11.42     | 40.80     | 46.96       | 118.03     |
| HER2 G778insLPS       | 63.77     | 6.96      | 1.67     | 3.39        | 1.99      | 0.87       | 0.18       | 0.98      | 7.02      | 16.90       | 44.48      |
| HER2 P780insGSP       | 299.25    | 892.97    | 27.59    | 95.57       | 32.27     | 6.28       | 4.12       | 23.10     | 121.05    | 440.31      | 350.86     |
| HER2 L786V            | 163.28    | 21.42     | 5.02     | 9.78        | 1.41      | 1.64       | 1.22       | 2.26      | 8.09      | 8.30        | 25.37      |
| HER2 V842I            | 49.27     | 8.25      | 4.05     | 6.48        | 1.51      | 0.82       | 0.45       | 0.65      | 9.13      | 24.31       | 49.03      |
| HER2 L869R            | 195.70    | 35.57     | 1.44     | 3.07        | 0.96      | 0.77       | 0.81       | 4.96      | 25.37     | 27.61       | 29.06      |

**B**

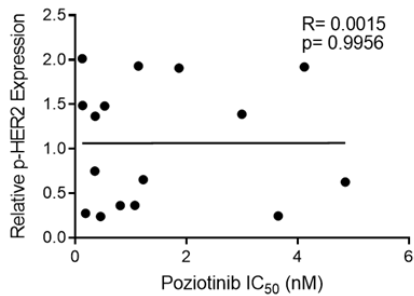

**Figure S3 related to Figure 4: Ba/F3 cell drug sensitivity does not correlate with HER2 expression.**

**(A)** Chart of average IC<sub>50</sub> (nM) values of Ba/F3 cell lines treated with indicated inhibitors for 72 hr (n = 3 biologically independent experiments).

**(B)** Correlation of the relative p-HER2 was plotted against poziotinib IC<sub>50</sub> values for Ba/F3 HER2 mutant cell lines. Pearson correlations and p values were determined by GraphPad Prism (n = 3).

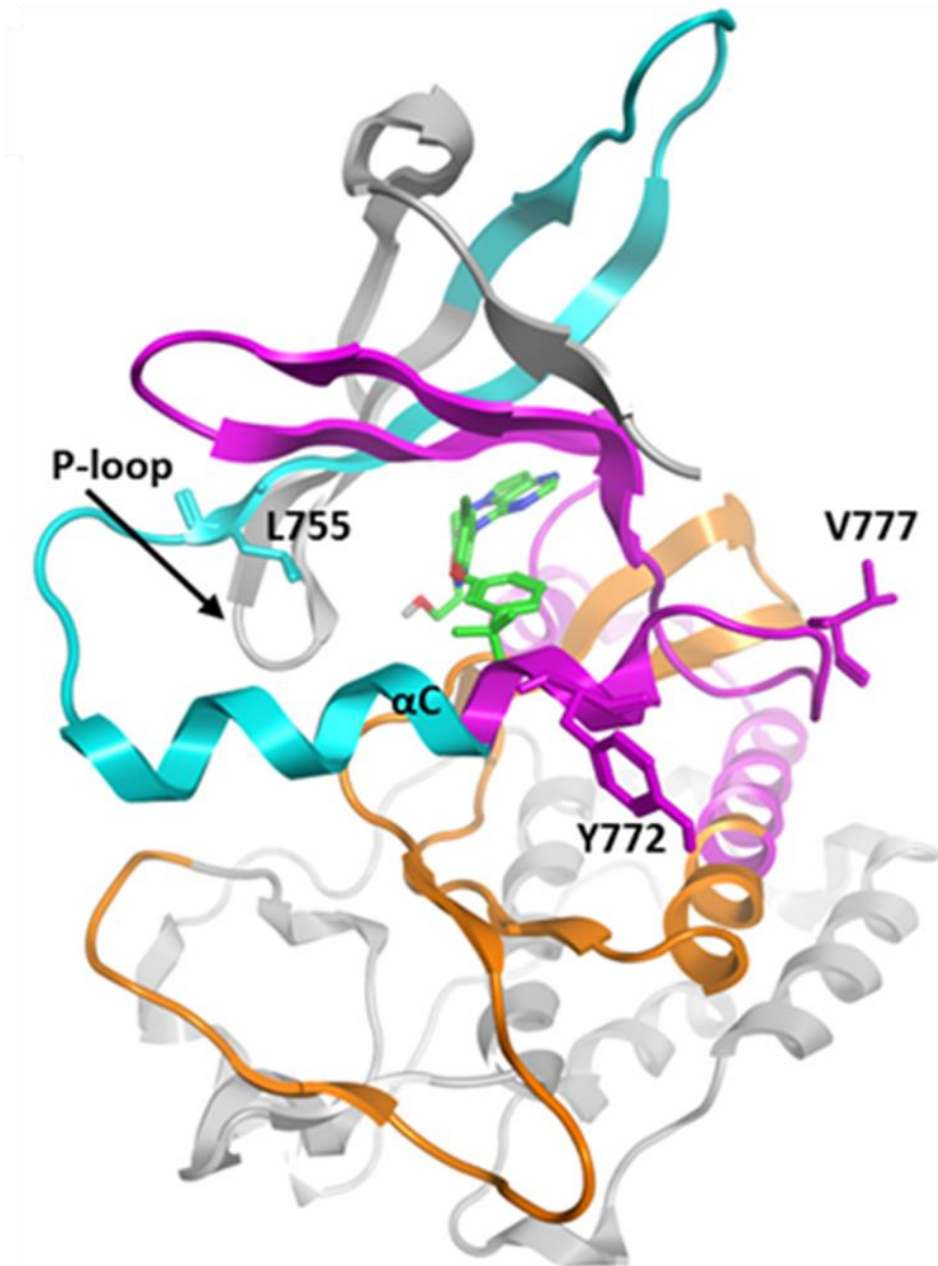

**Figure S4 Related to Figure 5: Molecular modeling reveals HER2 mutants differ in binding pocket size.**

The protein backbone of HER2 kinase domain encoded by exons 19, 20 and 21 are colored in blue, pink, and orange, respectively. The ligand from the template X-ray structure (PDB 3PP0) is rendered in green sticks and labels are provided for mutated residues/insertion locations.

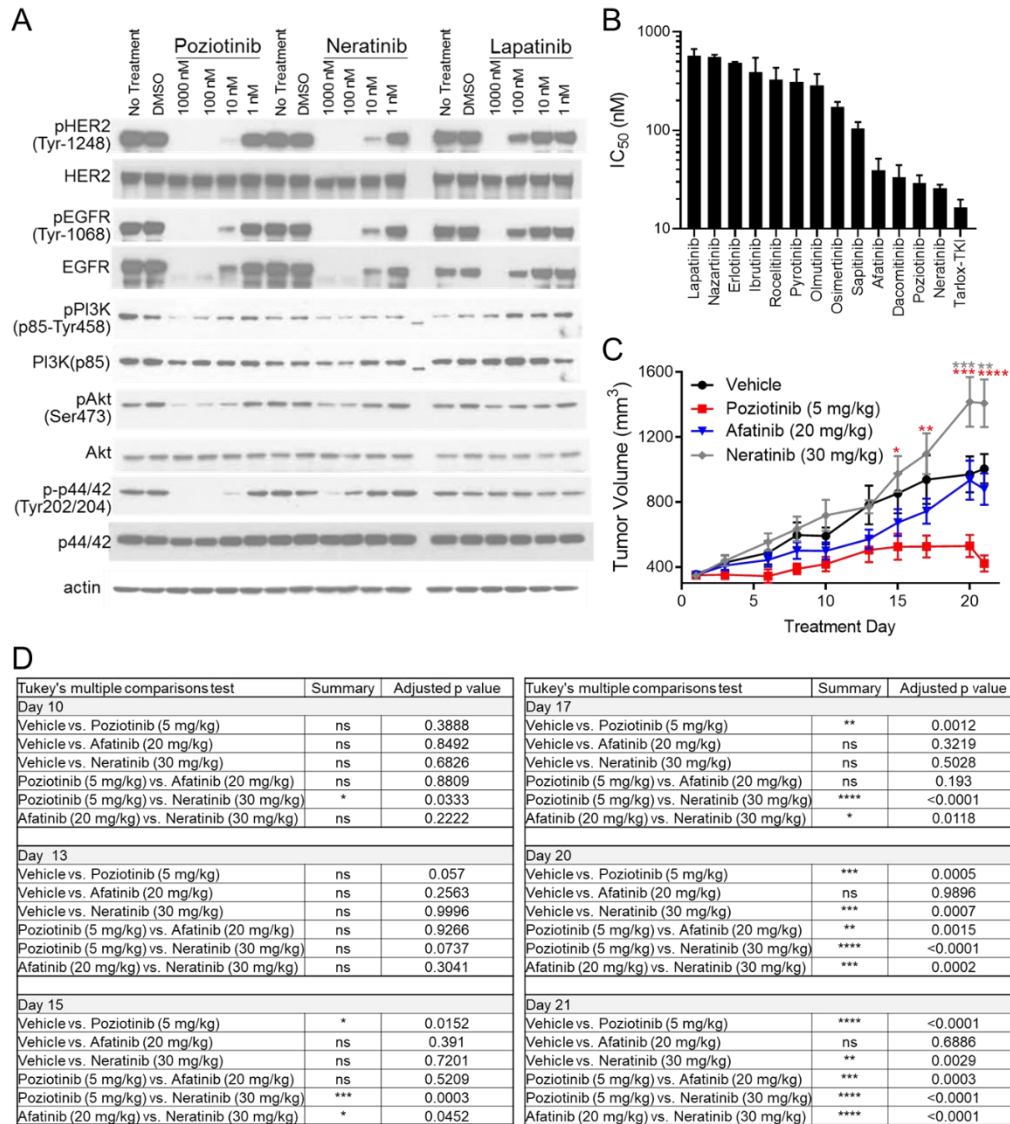

**Figure S5 Related to Figure 6: Poziotinib inhibits p-HER2 in HER2 mutant cell lines and inhibits tumor growth in a xenograft of exon 19 mutant colorectal cancer.**

**(A)** Western blot of MCF10A cells expressing G776delinsVC after 2 hr treatment of the indicated drugs and doses.

**(B)** Bar plot of average  $IC_{50}$  values of MCF10A cells expressing WT HER2 treated with indicated inhibitors for 72 hr. Bars are representative of mean  $\pm$  SEM ( $n = 3$ ).

**(C)** Poziotinib inhibits tumor growth in a xenograft of exon 19 mutant colorectal cancer. CW-2 cells harboring an *ERBB2* L755S mutation were injected into the flanks of 6-week-old female nu/nu nude mice. When tumors reached 350 mm<sup>3</sup> mice were randomized into four groups: 20 mg/kg afatinib, 5 mg/kg poziotinib, 30 mg/kg neratinib, or vehicle control. Tumor volumes were measured three times per week, and mice received drug Monday- Friday (5 days per week). Symbols are representative of the mean  $\pm$  SEM for each time point.

**(D)** Two-Way ANOVA with Tukey's multiple comparisons test was used to determine statistical significance. Asterisk indicate significance between vehicle and poziotinib (red) or neratinib (grey). p values for each comparison are listed below beginning at 10 day when significant differences were first detected.

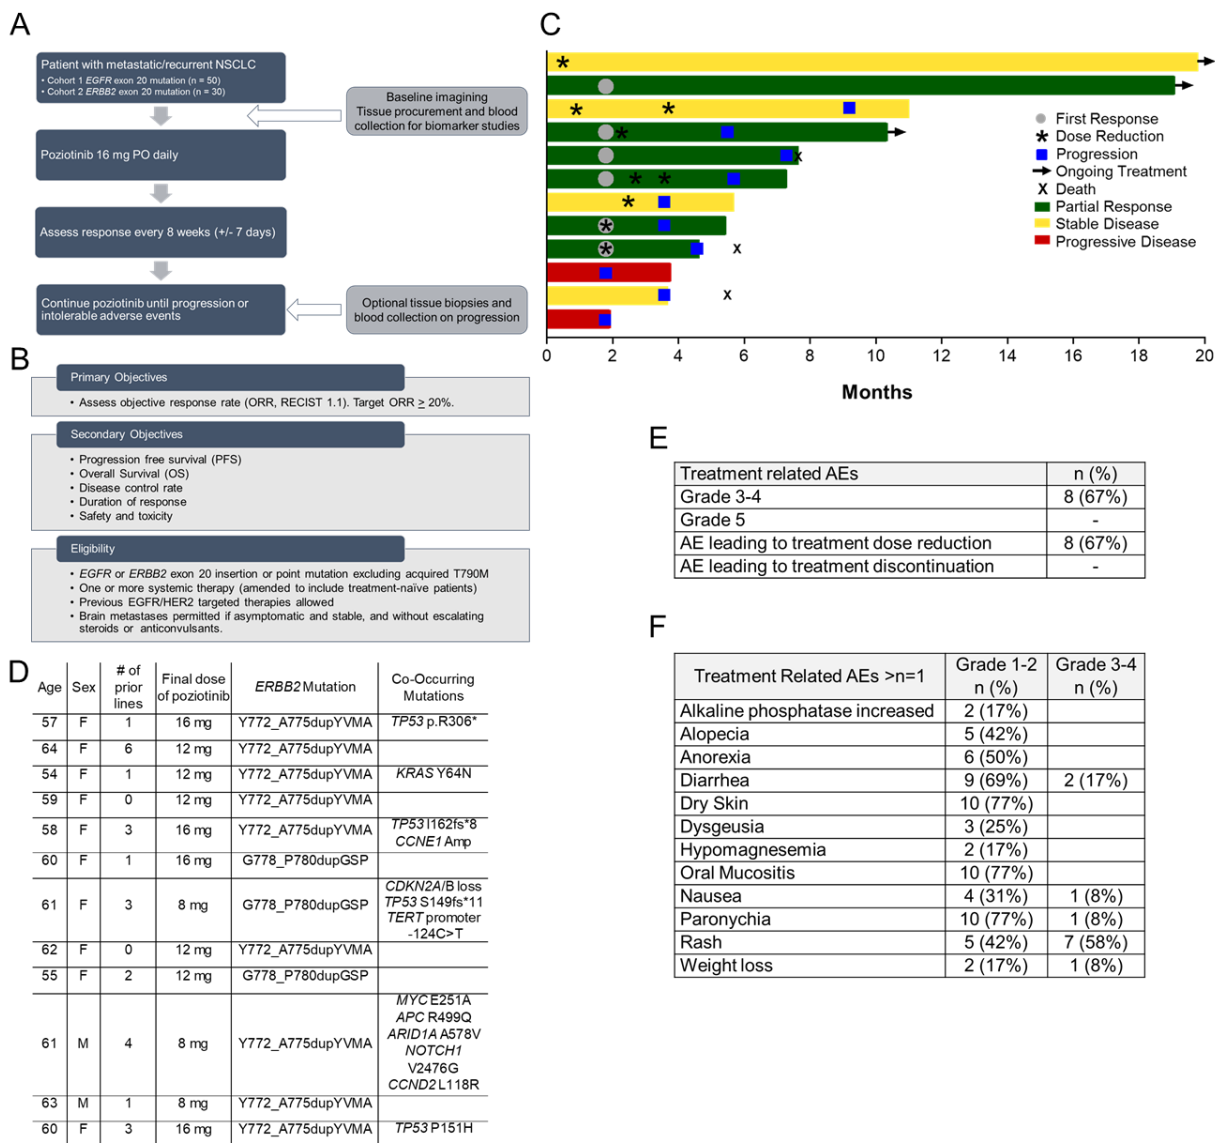

**Figure S6 Related to Figure 7: Study schema, objectives, eligibility, and patient characteristics and co-mutations for clinical trial NCT03066206.**

**(A)** Flow chart of study schema including timeline of patient assessments.

**(B)** Chart of primary objectives, secondary objectives, and patient eligibility.

**(C)** Swimmers' plots of individual patients' treatment and response to treatment over time.

**(D)** Patient characteristics, dose of poziotinib, ERBB2 mutations, and co-occurring mutations.

**(E)** Safety summary for n = 12 patients.

**(F)** Treatment related adverse events (AEs) occurring in more than one patient for n = 12 patients.

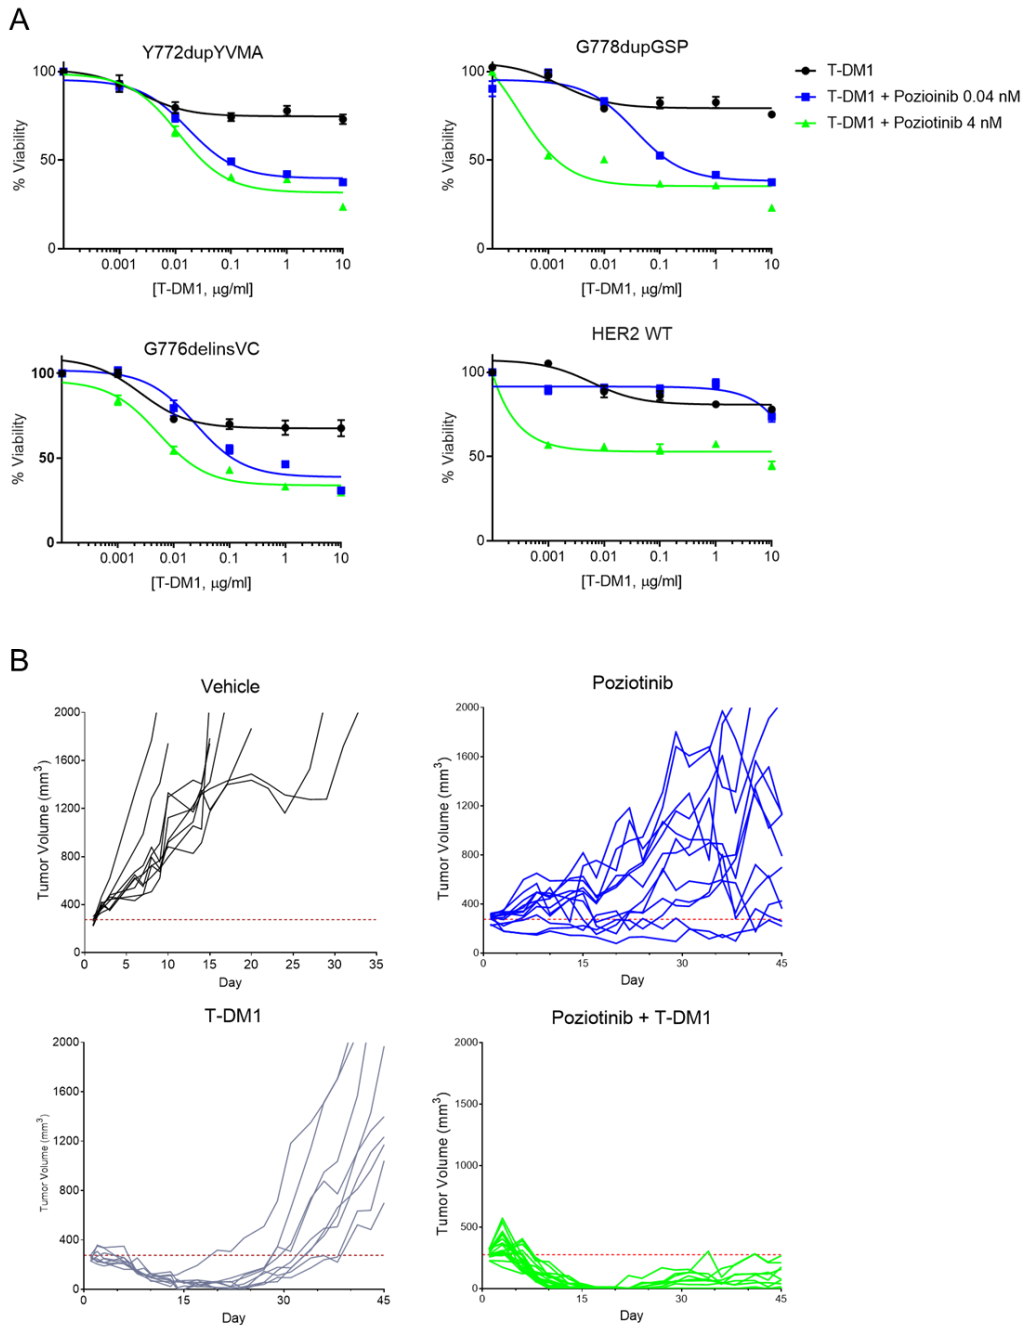

**Figure S7 Related to Figure 8: Combination of poizotinib and T-DM1 treatment potentiates anti-tumor activity *in vitro* and *in vivo*.**

**(A)** Dose response curves of MCF10A cell lines expressing HER2 Y772dupYVMA, HER2 G778dupGSP, HER2 G776delinsVC or WT HER2 with T-DM1 alone (black) or T-DM1 in combination with poizotinib (0.04 nM blue and 4 nM green). Cells were treated for 72 hr, and cell viability was determined by Cell Titer Glo Assay. Symbols are representative a mean  $\pm$  SEM. Graphs are representative of  $n = 2$  independent experiments.

**(B)** Spider plots of tumor volume of HER2 Y772dupYVMA PDX mice treated with indicated inhibitors. The red dotted line indicates the point of randomization ( $275 \text{ mm}^3$ ).
